# Supplementary material for: Phylogenetic Analyses of Some Key Genes Provide Information on Pollinator Attraction in Solanaceae
Source: MDPI journal article supplement (doi:10.3390/genes13122278), 2022-12-03
Supplement: s1 [file s1]

**Phylogenetic analyses of some key genes provide information on pollinator attraction in Solanaceae**

Aléxia Gonçalves Pereira<sup>1</sup>, Sebastián Guzmán-Rodríguez<sup>1</sup>, Loreta B. Freitas<sup>1,\*</sup>

<sup>1</sup>Laboratory of Molecular Evolution, Department of Genetics, Universidade Federal do Rio Grande do Sul, Porto Alegre, RS 91501-970, Brazil.

\*Corresponding author: Department of Genetics, UFRGS, P.O. Box 15053, Porto Alegre, RS 91501-970, Brazil. Fax: +55 51 3308 9823. E-mail: [loreta.freitas@ufrgs.br](mailto:loreta.freitas@ufrgs.br) (L.B. Freitas).

**Supplementary material**

**Table S1** Accession numbers for the CDS sequences of the DFR, ODO1, MYB-FL, and NEC 1 genes, used in this study. The colors indicate de query sequence used in the BLAST. The species color matches the sequence code in the database

| Species                                       | Gene | Query    | CDS Access number                      | Gene Size<br>(pb) | CDS Size<br>(pb) | Database      |
|-----------------------------------------------|------|----------|----------------------------------------|-------------------|------------------|---------------|
| <i>Petunia axillaris</i>                      | DFR  | X79723.1 | Peaxi162Scf00366g00630.1<br>lcl ORF15/ | 1779              | 1143             | Sol Genomics  |
| <i>Petunia exserta</i>                        | DFR  | X79723.1 | Peex113Ctg18167g00015.1                | 1699              | 1143             | Transcriptome |
| <i>Petunia hybrida (query)</i>                | DFR  | X79723.1 | X79723.1                               | 3879              | 1143             | NCBI          |
| <i>Petunia inflata</i>                        | DFR  | X79723.1 | Peinf101Scf00073g04027.1<br>lcl ORF6 e | 1134              | 1143             | Sol Genomics  |
| <i>Petunia secreta</i>                        | DFR  | X79723.1 | Psec_k119Scf2421385g0000020.1          | -                 | 1143             | Transcriptome |
| <i>Capsicum annuum</i>                        | DFR  | X79723.1 | CA02g22270                             | 1584              | 1047             | Sol Genomics  |
| <i>Capsicum annuum var.<br/>glabriusculum</i> | DFR  | X79723.1 | Capang08g000739                        | -                 | 1146             | Sol Genomics  |
| <i>Capsicum annuum var.<br/>zunla</i>         | DFR  | X79723.1 | Capana02g002763                        | -                 | 1149             | Sol Genomics  |
| <i>Nicotiana attenuata</i>                    | DFR  | X79723.1 | NIATv7_g64584.t1                       | 1418              | 1143             | Sol Genomics  |
| <i>Nicotiana benthamiana 1</i>                | DFR  | X79723.1 | Niben101Scf00606g02015.1               | 1201              | 1201             | Sol Genomics  |
| <i>Nicotiana benthamiana 2</i>                | DFR  | X79723.1 | Niben101Scf00305g05035.1               | 1186              | 1186             | Sol Genomics  |
| <i>Nicotiana sylvestris</i>                   | DFR  | X79723.1 | mRNA_57456_cds                         | 1467              | 1146             | Sol Genomics  |
| <i>Nicotiana tabacum 1<br/>(TN90)</i>         | DFR  | X79723.1 | mRNA_13452                             | 1492              | 1478             | Sol Genomics  |
| <i>Nicotiana tabacum 2<br/>(TN90)</i>         | DFR  | X79723.1 | mRNA_43521                             | 1488              | 1146             | Sol Genomics  |
| <i>Nicotiana tomentosiformis</i>              | DFR  | X79723.1 | mRNA_5184_cds                          | 1815              | 1149             | Sol Genomics  |
| <i>Sollanum lycopersicum</i>                  | DFR  | X79723.1 | Solyc02g085020.4.1                     | 1844              | 1140             | Sol Genomics  |
| <i>Solanum melogenta</i>                      | DFR  | X79723.1 | Sme2.5_01401.1_g00004.1                | -                 | 1149             | Sol Genomics  |

|                                                     |      |          |                          |      |      |               |
|-----------------------------------------------------|------|----------|--------------------------|------|------|---------------|
| <i>Solanum pennellii</i>                            | DFR  | X79723.1 | Sopen02g029720           | 2042 | 1149 | Sol Genomics  |
| <i>Solanum pimoinellifolium</i>                     | DFR  | X79723.1 | Sopim02g085020.0.1       | -    | 1140 | Sol Genomics  |
| <i>Solanum tuberosum</i><br>(PGSC)                  | DFR  | X79723.1 | PGSC0003DMC400006441     | -    | 1149 | Sol Genomics  |
| <i>Arabidopsis thaliana</i>                         | DFR  | X79723.1 | AT5G42800.1 / NM 123645  | 1520 | 1149 | TAIR          |
| <i>Petunia axillaris</i>                            | ODO1 | AY705977 | Pax_162mrnav4_ODO1_      | 1520 | 885  | Sol Genomics  |
| <i>Petunia exserta</i>                              | ODO1 | AY705977 | Mich_Pex_ODO1            | 1374 | 885  | Transcriptome |
| <i>Petunia x hybrida (query)</i>                    | ODO1 | AY705977 | AY705977                 | 1535 | 885  | NCBI          |
| <i>Petunia inflata</i>                              | ODO1 | AY705977 | Peinf101Scf00284g00012.1 | 1700 | 618  | Sol Genomics  |
| <i>Petunia secreta</i>                              | ODO1 | AY705977 | Psec_k119_mak_ODO1       | 1397 | 885  | Transcriptome |
| <i>Capsicum annuum</i>                              | ODO1 | AY705977 | CA01g04550               | 2163 | 837  | Sol Genomics  |
| <i>Capsicum annuum</i> var.<br><i>glabriusculum</i> | ODO1 | AY705977 | Capang01g000437          | -    | 834  | Sol Genomics  |
| <i>Capsicum annuum</i> var.<br><i>zunla</i>         | ODO1 | AY705977 | Capana01g000495          | -    | 837  | Sol Genomics  |
| <i>Nicotiana attenuata</i>                          | ODO1 | AY705977 | NIATv7_g05044.t1         | 1460 | 855  | Sol Genomics  |
| <i>Nicotiana benthamiana 1</i>                      | ODO1 | AY705977 | Niben101Scf15721g00003.1 | 1617 | 855  | Sol Genomics  |
| <i>Nicotiana benthamiana 2</i>                      | ODO1 | AY705977 | Niben101Scf01732g02016.1 | 1612 | 855  | Sol Genomics  |
| <i>Nicotiana sylvestis</i>                          | ODO1 | AY705977 | mRNA_27607_cds           | 1492 | 855  | Sol Genomics  |
| <i>Nicotiana tabacum 1</i><br>(TN90)                | ODO1 | AY705977 | mRNA_184876              | 1473 | 846  | Sol Genomics  |
| <i>Nicotiana tabacum 2</i><br>(TN90)                | ODO1 | AY705977 | mRNA_45796               | 1472 | 855  | Sol Genomics  |
| <i>Nicotiana tomentosiformis</i>                    | ODO1 | AY705977 | mRNA_55682               | 1719 | 846  | Sol Genomics  |
| <i>Solanum lycopersicum</i>                         | ODO1 | AY705977 | Solyc08g079270.3.1       | 1204 | 864  | Sol Genomics  |
| <i>Solanum melongena</i>                            | ODO1 | AY705977 | SMEL_008g317320.1.01     | 2322 | 861  | Sol Genomics  |
| <i>Solanum penneellii</i>                           | ODO1 | AY705977 | Sopen08g027720           | -    | 867  | Sol Genomics  |

|                                                           |        |                  |                           |      |      |              |
|-----------------------------------------------------------|--------|------------------|---------------------------|------|------|--------------|
| <i>Solanum pimpinellifolium</i>                           | ODO1   | AY705977         | Sopim08g079270.0.1        | -    | 864  | Sol Genomics |
| <i>Solanum tuberosum</i><br>(PGSC)                        | ODO1   | AY705977         | PGSC0003DMP400008480      | -    | 846  | Sol Genomics |
| <i>Arabidopsis thaliana 1</i>                             | ODO1   | AY705977         | AT4G12350.1               | 1248 | 861  | TAIR         |
| <i>Arabidopsis thaliana 2</i>                             | ODO1   | AY705977         | AT4G22680.1               | 1400 | 801  | TAIR         |
| <i>Petunia axillaris</i> sub.<br><i>axillaris</i>         | MYB-FL | MH732766         | KT962949                  | 4573 | 1056 | NCBI         |
| <i>Petunia exserta</i>                                    | MYB-FL | MH732767         | KT962950                  | 5502 | 606  | NCBI         |
| <i>Petunia inflata</i>                                    | MYB-FL | MH732766         | KT962951                  | 4757 | 1053 | NCBI         |
| <i>Petunia secreta</i> (query)                            | MYB-FL | MH732766         | MH732766/ AZF99108 (prot) | 4555 | 1053 | NCBI         |
| <i>Capsicum annuum</i>                                    | MYB-FL | MH732766         | CA05g18430                | 2474 | 1203 | Sol Genomics |
| <i>Capsicum annuum</i> var.<br><i>glabriusculum</i>       | MYB-FL | CA05g18430       | Capang00g002992           | -    | 1020 | Sol Genomics |
| <i>Capsicum annuum</i> var.<br><i>zunla</i>               | MYB-FL | CA05g18430       | Capana05g000377           | -    | 1083 | Sol Genomics |
| <i>Nicotiana attenuata 1</i><br>( <i>Nicotiana</i> query) | MYB-FL | MH732766         | NIATv7_g40261.t1          | 1171 | 993  | Sol Genomics |
| <i>Nicotiana attenuata 2</i>                              | MYB-FL | KT962949         | XM_019385552              | 1217 | 765  | NCBI         |
| <i>Nicotiana benthamiana</i>                              | MYB-FL | NIATv7_g40261.t1 | Niben101Scf08782g00003.1  | 2658 | 468  | Sol Genomics |
| <i>Nicotiana glauca</i>                                   | MYB-FL | MH732766         | XM_009803597              | 1137 | 983  | NCBI         |
| <i>Nicotiana tabacum 1</i><br>(TN90)                      | MYB-FL | MH732766         | mRNA_112793               | 1238 | 984  | Sol Genomics |
| <i>Nicotiana tabacum 2</i><br>(TN90)                      | MYB-FL | MH732766         | mRNA_164759               | 1085 | 888  | Sol Genomics |
| <i>Nicotiana tomentosiformis</i><br><i>1</i>              | MYB-FL | MH732766         | XM_018774884.1            | 1065 | 726  | NCBI         |

|                                                      |        |                    |                              |      |      |               |
|------------------------------------------------------|--------|--------------------|------------------------------|------|------|---------------|
| <i>Nicotiana tomentosiformis</i><br>2                | MYB-FL | NIATv7_g40261.t1   | mRNA_37095_cds               | 1126 | 888  | Sol Genomics  |
| <i>Solanum lycopersicum</i> ( <i>Solanum query</i> ) | MYB-FL | AT5G49330.1        | Solyc01g079620.2.1           | 1143 | 1017 | Sol Genomics  |
| <i>Solanum pennellii</i>                             | MYB-FL | Solyc01g079620.2.1 | Sopen01g031400               | 2002 | 1083 | Sol Genomics  |
| <i>Solanum pimpinellifolium</i>                      | MYB-FL | Solyc01g079620.2.1 | Sopim01g079620.0.1           | -    | 1017 | Sol Genomics  |
| <i>Solanum tuberosum</i><br>(PGSC)                   | MYB-FL | Solyc01g079620.2.1 | PGSC0003DMP400015892         | -    | 1092 | Sol Genomics  |
| <i>Arabidopsis thaliana</i>                          | MYB-FL | MH732766           | AT5G49330.1                  | 1632 | 1029 | TAIR          |
| <i>Petunia axillaris</i>                             | NEC1   | AF313914.1         | Peaxi162Scf00303g00004.1     | 1105 | 843  | Sol Genomics  |
| <i>Petunia exserta</i>                               | NEC1   | AF313914.1         | Mich_Pex_NEC1_GBRT01053536.1 | 1215 | 797  | Transcriptome |
| <i>Petunia hybrida</i>                               | NEC1   | AF313914.1         | AF313914.1/Q9FPN0.1          | 1182 | 798  | NCBI          |
| <i>Petunia inflata</i>                               | NEC1   | AF313914.1         | Peinfl101Scf00179g11021.1    | 1093 | 843  | Sol Genomics  |
| <i>Petunia secreta</i>                               | NEC1   | AF313914.1         | Psec_k119_mak_NEC1           | 477  | 477  | Transcriptome |
| <i>Capsicum annuum</i> var.<br><i>zunla</i>          | NEC1   | AF313914.1         | Capana02g000800              | -    | 684  | Sol Genomics  |
| <i>Nicotiana attenuata</i>                           | NEC1   | AT2G39060.1        | KC832836.1                   | 1296 | 819  | NCBI          |
| <i>Nicotiana benthamiana</i> 1                       | NEC1   | Q9FPN0.1           | Niben101Scf02594g03008.1     | 1010 | 706  | Sol Genomics  |
| <i>Nicotiana benthamiana</i> 2                       | NEC1   | Q9FPN0.1           | Niben101Scf04629g03012.1     | 1057 | 819  | Sol Genomics  |
| <i>Nicotiana sylvestris</i>                          | NEC1   | Q9FPN0.1           | mRNA_19339_cds               | 971  | 781  | Sol Genomics  |
| <i>Nicotiana tabacum</i> 1<br>(TN90)                 | NEC1   | Q9FPN0.1           | mRNA_31109                   | 1000 | 795  | Sol Genomics  |
| <i>Nicotiana tabacum</i> 2<br>(TN90)                 | NEC1   | Q9FPN0.1           | mRNA_68247                   | 1174 | 795  | Sol Genomics  |
| <i>Nicotiana tomentosiformis</i>                     | NEC1   | Q9FPN0.1           | mRNA_60304_cds               | 1235 | 795  | Sol Genomics  |

|                                                      |      |                    |                         |      |     |              |
|------------------------------------------------------|------|--------------------|-------------------------|------|-----|--------------|
| <i>Solanum lycopersicum</i> ( <i>Solanum query</i> ) | NEC1 | Q9FPN0.1           | Solyc09g074530.3.1      | 1136 | 861 | Sol Genomics |
| <i>Solanum melogenta</i>                             | NEC1 | Solyc09g074530.3.1 | Sme2.5_06014.1_g00003.1 | 1613 | 867 | Sol Genomics |
| <i>Solanum pennellii</i>                             | NEC1 | Solyc09g074530.3.1 | Sopen09g029370          | -    | 861 | Sol Genomics |
| <i>Solanum pimpinellifolium</i>                      | NEC1 | Solyc09g074530.3.1 | Sopim09g074530.0.1      | -    | 861 | Sol Genomics |
| <i>Solanum tuberosum</i> (PGSC)                      | NEC1 | Solyc09g074530.3.1 | PGSC0003DMC400020098    | -    | 864 | Sol Genomics |
| <i>Arabidopsis thaliana</i>                          | NEC1 | AT2G39060.1        | AT2G39060.1             | 902  | 777 | TAIR         |

**Table S2** Accession numbers for the protein sequences of the DFR, ODO1, MYB-FL and NEC 1 genes, used in this study. The colors indicate de query sequence used in the BLAST. The species color matches the sequence code in the database

| <i>Species</i>                            | Gene | <i>Query</i>     | Protein Access number     | Size (aa) | Domain/ HMMER | Database      |
|-------------------------------------------|------|------------------|---------------------------|-----------|---------------|---------------|
| <i>Petunia axillaris</i>                  | DFR  | P14720           | Peaxi162Scf00366g00630.1  | 380       | Epimerase     | SolGenomics   |
| <i>Petunia exserta</i>                    | DFR  | P14720           | lcl_ORF15                 | 380       | Epimerase     | Transcriptoma |
| <i>Petunia hybrida (query)</i>            | DFR  | P14721           | P14720                    | 380       | Epimerase     | NCBI          |
| <i>Petunia inflata</i>                    | DFR  | P14720           | Peinfl101Scf00073g04027.1 | 380       | Epimerase     | SolGenomics   |
| <i>Petunia secreta</i>                    | DFR  | P14720           | lcl_ORF6                  | 380       | Epimerase     | Transcriptoma |
| <i>Capsicum annuum</i>                    | DFR  | P14720           | CA02g22270                | 348       | Epimerase     | SolGenomics   |
| <i>Capsicum annuum var. glabriusculum</i> | DFR  | P14720           | Capang08g000739           | 382       | Epimerase     | SolGenomics   |
| <i>Capsicum annuum var. zunla</i>         | DFR  | P14720           | Capana02g002763           | 382       | Epimerase     | SolGenomics   |
| <i>Nicotiana attenuata</i>                | DFR  | P14720           | NIATv7_g64584.t1          | 380       | Epimerase     | SolGenomics   |
| <i>Nicotiana benthamiana 1</i>            | DFR  | NIATv7_g64584.t1 | Niben101Scf00606g02015.1  | 380       | Epimerase     | SolGenomics   |
| <i>Nicotiana benthamiana 2</i>            | DFR  | NIATv7_g64584.t1 | Niben101Scf00305g05035.1  | 382       | Epimerase     | SolGenomics   |
| <i>Nicotiana glauca</i>                   | DFR  | P14720           | mRNA_57456_cds            | 381       | Epimerase     | SolGenomics   |
| <i>Nicotiana tabacum 1 (TN90)</i>         | DFR  | P14722           | mRNA_13452                | 382       | Epimerase     | SolGenomics   |
| <i>Nicotiana tabacum 2 (TN90)</i>         | DFR  | P14721           | mRNA_43521                | 381       | Epimerase     | SolGenomics   |
| <i>Nicotiana tomentosiformis</i>          | DFR  | P14720           | mRNA_5184_cds             | 382       | Epimerase     | SolGenomics   |
| <i>Solanum lycopersicum</i>               | DFR  | P14723           | Solyc02g085020.4.1        | 379       | Epimerase     | SolGenomics   |
| <i>Solanum melongena</i>                  | DFR  | P14724           | Sme2.5_01401.1_g00004.1   | 382       | Epimerase     | SolGenomics   |
| <i>Solanum pennellii</i>                  | DFR  | P14725           | Sopen02g029720            | 382       | Epimerase     | SolGenomics   |
| <i>Solanum pimoinellifolium</i>           | DFR  | P14726           | Sopim02g085020.0.1        | 379       | Epimerase     | SolGenomics   |
| <i>Solanum tuberosum (PGSC)</i>           | DFR  | P14728           | PGSC0003DMC400006441      | 382       | Epimerase     | SolGenomics   |
| <i>Arabidopsis thaliana</i>               | DFR  | P14729           | At1g01030                 | 382       | Epimerase     | TAIR          |

|                                                  |        |          |                           |     |            |               |
|--------------------------------------------------|--------|----------|---------------------------|-----|------------|---------------|
| <i>Petunia axillaris</i> (Gina)                  | ODO1   | AAV98200 | Pax_162mrnav4_ODO1_       | 294 | 2 Myb-like | Transcriptoma |
| <i>Petunia exserta</i> (Gina)                    | ODO1   | AAV98200 | Mich_Pex_ODO1             | 294 | 2 Myb-like | Transcriptoma |
| <i>Petunia x hybrida</i>                         | ODO1   | AAV98200 | AAV98200                  | 294 | 2 Myb-like | NCBI          |
| <i>Petunia inflata</i>                           | ODO1   | AAV98200 | Peinfl101Scf00284g00012.1 | 205 | Myb-like   | SolGenomics   |
| <i>Petunia secreta</i> (Gina)                    | ODO1   | AAV98200 | Psec_k119_mak_ODO1        | 294 | 2 Myb-like | SolGenomics   |
| <i>Capsicum annuum</i>                           | ODO1   | AAV98200 | CA01g04550                | 278 | 2 Myb-like | SolGenomics   |
| <i>Capsicum annuum</i> var. <i>glabriusculum</i> | ODO1   | AAV98200 | Capang01g000437           | 278 | 2 Myb-like | SolGenomics   |
| <i>Capsicum annuum</i> var. <i>zunla</i>         | ODO1   | AAV98200 | Capana01g000495           | 278 | 2 Myb-like | SolGenomics   |
| <i>Nicotiana attenuata</i>                       | ODO1   | AAV98200 | NIATv7_g05044.t1          | 284 | 2 Myb-like | SolGenomics   |
| <i>Nicotiana benthamiana</i> 1                   | ODO1   | AAV98200 | Niben101Scf15721g00003.1  | 284 | 2 Myb-like | SolGenomics   |
| <i>Nicotiana benthamiana</i> 2                   | ODO1   | AAV98200 | Niben101Scf01732g02016.1  | 284 | 2 Myb-like | SolGenomics   |
| <i>Nicotiana sylvestis</i>                       | ODO1   | AAV98200 | mRNA_27607_cds            | 284 | 2 Myb-like | SolGenomics   |
| <i>Nicotiana tabacum</i> 1 (TN90)                | ODO1   | AAV98200 | mRNA_184876               | 281 | 2 Myb-like | SolGenomics   |
| <i>Nicotiana tabacum</i> 2 (TN90)                | ODO1   | AAV98200 | mRNA_45796                | 284 | 2 Myb-like | SolGenomics   |
| <i>Nicotiana tomentosiformis</i>                 | ODO1   | AAV98200 | mRNA_55682                | 281 | 2 Myb-like | SolGenomics   |
| <i>Solanum lycopersicum</i>                      | ODO1   | AAV98200 | Solyc08g079270.3.1        | 287 | 2 Myb-like | SolGenomics   |
| <i>Solanum melongena</i>                         | ODO1   | AAV98200 | SMEL_008g317320.1.01      | 286 | 2 Myb-like | SolGenomics   |
| <i>Solanum penneellii</i>                        | ODO1   | AAV98200 | Sopen08g027720            | 288 | 2 Myb-like | SolGenomics   |
| <i>Solanum pimpinellifolium</i>                  | ODO1   | AAV98200 | Sopim08g079270.0.1        | 287 | 2 Myb-like | SolGenomics   |
| <i>Solanum tuberosum</i> (PGSC)                  | ODO1   | AAV98200 | PGSC0003DMP400008480      | 281 | 2 Myb-like | SolGenomics   |
| <i>Arabidopsis thaliana</i> 1                    | ODO1   | AAV98200 | AT4G12350.1               | 286 | 2 Myb-like | TAIR          |
| <i>Arabidopsis thaliana</i> 2                    | ODO1   | AAV98200 | AT4G22680.1               | 266 | 2 Myb-like | TAIR          |
| <i>Petunia axillaris</i>                         | MYB-FL | MH732766 | ALQ80977                  | 351 | 2 Myb-like | NCBI          |
| <i>Petunia exserta</i>                           | MYB-FL | MH732766 | ALQ80978.1                | 201 | 2 Myb-like | NCBI          |
| <i>Petunia inflata</i>                           | MYB-FL | MH732766 | ALQ80979                  | 351 | 2 Myb-like | NCBI          |



|                                                            |        |                    |                              |     |            |               |
|------------------------------------------------------------|--------|--------------------|------------------------------|-----|------------|---------------|
| <i>Petunia secreta (query)</i>                             | MYB-FL | MH732766           | AZF99108                     | 350 | 2 Myb-like | NCBI          |
| <i>Capsicum annuum</i>                                     | MYB-FL | MH732766           | CA05g18430                   | 400 | 2 Myb-like | SolGenomics   |
| <i>Capsicum annuum</i> var.<br><i>glabriusculum</i>        | MYB-FL | CA05g18430         | Capang00g002992              | 340 | Myb-like   | SolGenomics   |
| <i>Capsicum annuum</i> var. <i>zunla</i>                   | MYB-FL | CA05g18430         | Capana05g000377              | 362 | Myb-like   | SolGenomics   |
| <i>Nicotiana attenuata 1</i><br>( <i>Nicotiana query</i> ) | MYB-FL | MH732766           | NIATv7_g40261.t1             | 330 | 2 Myb-like | SolGenomics   |
| <i>Nicotiana attenuata 2</i>                               | MYB-FL | KT962949           | XP_019241097                 | 329 | 2 Myb-like | NCBI          |
| <i>Nicotiana benthamiana</i>                               | MYB-FL | NIATv7_g40261.t1   | Niben101Scf08782g00003.1     | 155 | 2 Myb-like | SolGenomics   |
| <i>Nicotiana sylvestris</i>                                | MYB-FL | NIATv7_g40261.t1   | mRNA_47970_cds               | 327 | 2 Myb-like | NCBI          |
| <i>Nicotiana tabacum 1 (TN90)</i>                          | MYB-FL | NIATv7_g40261.t1   | mRNA_112793                  | 327 | 2 Myb-like | SolGenomics   |
| <i>Nicotiana tabacum 2 (TN90)</i>                          | MYB-FL | NIATv7_g40261.t1   | mRNA_164759                  | 295 | 2 Myb-like | SolGenomics   |
| <i>Nicotiana tomentosiformis 1</i>                         | MYB-FL | MH732766           | XP_018630400.1               | 295 | 2 Myb-like | NCBI          |
| <i>Nicotiana tomentosiformis 2</i>                         | MYB-FL | NIATv7_g40261.t1   | mRNA_37095_cds               | 295 | 2 Myb-like | SolGenomics   |
| <i>Solanum</i><br><i>lycopersicum (Solanum query)</i>      | MYB-FL | AT5G49330.1        | Solyc01g079620.4.1           | 338 | 2 Myb-like | SolGenomics   |
| <i>Solanum pennellii</i>                                   | MYB-FL | Solyc01g079620.2.1 | Sopen01g031400               | 360 | 2 Myb-like | SolGenomics   |
| <i>Solanum pimpinellifolium</i>                            | MYB-FL | Solyc01g079620.2.1 | Sopim01g079620.0.1           | 338 | 2 Myb-like | SolGenomics   |
| <i>Solanum tuberosum (PGSC)</i>                            | MYB-FL | Solyc01g079620.2.1 | PGSC0003DMP400015892         | 363 | 2 Myb-like | SolGenomics   |
| <i>Arabidopsis thaliana</i>                                | MYB-FL | MH732766           | AT5G49330.1                  | 342 | 2 Myb-like | TAIR          |
| <i>Petunia axillaris</i>                                   | NEC1   | AF313914.1         | Peaxi162Scf00303g00004.1     | 280 | 2 MtN3_slv | SolGenomics   |
| <i>Petunia exserta</i>                                     | NEC1   | AF313914.1         | Mich_Pex_NEC1_GBRT01053536.1 | 265 | 2 MtN3_slv | Transcriptoma |
| <i>Petunia hybrida</i>                                     | NEC1   | AF313914.1         | Q9FPN0.1                     | 265 | 2 MtN3_slv | NCBI          |
| <i>Petunia inflata</i>                                     | NEC1   | Q9FPN0.1           | Peinf101Scf00179g11021.1     | 280 | 2 MtN3_slv | SolGenomics   |
| <i>Petunia secreta</i>                                     | NEC1   | AF313914.1         | Psec_k119_mak_NEC1           | 158 | MtN3_slv   | Transcriptoma |
| <i>Capsicum annuum</i> var. <i>zunla</i>                   | NEC1   | Q9FPN0.1           | Capana02g000800              | 227 | MtN3_slv   | SolGenomics   |

|                                     |      |                    |                          |     |   |          |              |
|-------------------------------------|------|--------------------|--------------------------|-----|---|----------|--------------|
| <i>Nicotiana attenuata</i>          | NEC1 | AT2G39060.1        | AGL98401                 | 272 | 2 | MtN3_slv | NCBI         |
| <i>Nicotiana benthamiana 1</i>      | NEC1 | AGL98401           | Niben101Scf02594g03008.1 | 236 | 2 | MtN3_slv | SolGenomics  |
| <i>Nicotiana benthamiana 2</i>      | NEC1 | AGL98401           | Niben101Scf04629g03012.1 | 272 | 2 | MtN3_slv | SolGenomics  |
| <i>Nicotiana sylvestris</i>         | NEC1 | AGL98401           | mRNA_19339 gene_11121    | 263 | 2 | MtN3_slv | SolGenomises |
| <i>Nicotiana tabacum 1 (TN90)</i>   | NEC1 | AT2G39060.1        | mRNA_31109               | 263 | 2 | MtN3_slv | SolGenomics  |
| <i>Nicotiana tabacum 2 (TN90)</i>   | NEC1 | AT2G39060.1        | mRNA_68247               | 264 | 2 | MtN3_slv | SolGenomics  |
| <i>Nicotiana tomentosiformis</i>    | NEC1 | AGL98401           | mRNA_60304_cds           | 264 | 2 | MtN3_slv | SolGenomises |
| <i>Solanum</i>                      |      |                    |                          |     |   |          |              |
| <i>lycopersicum (Solanum query)</i> | NEC1 | Q9FPN0.1           | Solyc09g074530.3.1       | 286 | 2 | MtN3_slv | SolGenomics  |
| <i>Solanum melogenta</i>            | NEC1 | Solyc09g074530.3.1 | Sme2.5_06014.1_g00003.1  | 288 | 2 | MtN3_slv | SolGenomics  |
| <i>Solanum pennellii</i>            | NEC1 | Solyc09g074530.3.1 | Sopen09g029370           | 286 | 2 | MtN3_slv | SolGenomics  |
| <i>Solanum pimpinellifolium</i>     | NEC1 | Solyc09g074530.3.1 | Sopim09g074530.0.1       | 286 | 2 | MtN3_slv | SolGenomics  |
| <i>Solanum tuberosum (PGSC)</i>     | NEC1 | Solyc09g074530.3.1 | PGSC0003DMC400020098     | 287 | 2 | MtN3_slv | SolGenomics  |
| <i>Arabidopsis thaliana</i>         | NEC1 | AF313914.1         | AT2G39060.1              | 258 | 2 | MtN3_slv | TAIR         |

**Table S3** Parameter estimates for Site Model and log-likelihood values under-tested models. Values highlighted in bold indicate relevant values for the interpretation of the result. “np” stands for the number of parameters. Ln (Likelihood) refers to the log value of the likelihood

| Model  | np | Ln L         | Estimates of parameters |              |       | Model compared | LRT P-value | Positive sites |             |
|--------|----|--------------|-------------------------|--------------|-------|----------------|-------------|----------------|-------------|
| DFR    |    |              |                         |              |       |                |             |                |             |
|        |    |              | p:                      | 0.803        | 0.197 | 0.000          |             |                |             |
| M3     | 46 | -4088.738162 | ω:                      | 0.055        | 0.745 | 28.480         |             |                |             |
| M0     | 42 | -4155.312225 | ω0:                     | 0.151        |       |                | M0 vs. M3   | <b>0.000</b>   | Not Allowed |
|        |    |              | p:                      | 0.847        | 0.083 | 0.069          |             |                |             |
| M2a    | 45 | -4089.491462 | ω:                      | 0.066        | 1.000 | 1.000          |             |                |             |
|        |    |              | <b>p:</b>               | <b>0.847</b> | 0.153 |                |             |                |             |
| M1a    | 43 | -4089.491456 | <b>ω:</b>               | <b>0.066</b> | 1.000 |                | M1a vs. M2a | <b>1.000</b>   | Not Allowed |
|        |    |              | p0:                     | 0.922        |       |                |             |                |             |
|        |    |              | p:                      | 0.447        |       |                |             |                |             |
|        |    |              | p1                      | 0.078        |       |                |             |                |             |
|        |    |              | q:                      | 3.366        |       |                |             |                |             |
| M8     | 45 | -4080.601886 | ω:                      | 1.344        |       |                |             |                |             |
| M7     | 43 | -4089.772926 | p:                      | 0.288        |       |                |             |                |             |
|        |    |              | q:                      | 1.069        |       |                | M7 vs.M8    | 0.000          | Not Allowed |
| MYB-FL |    |              |                         |              |       |                |             |                |             |
|        |    |              | p:                      | 0.861        | 0.074 | 0.065          |             |                |             |
| M3     | 44 | -868.644773  | ω:                      | 0.058        | 0.415 | 0.920          |             |                |             |
| M0     | 40 | -882.433594  | ω0:                     | 0.107        |       |                | M0 vs. M3   | <b>0.000</b>   | Not Allowed |
| M2a    | 43 | -869.048348  | p:                      | 0.903        | 0.031 | 0.066          | M1a vs. M2a | <b>1.000</b>   | Not Allowed |

|      |    |              |             |              |       |       |           |              |             |             |              |             |
|------|----|--------------|-------------|--------------|-------|-------|-----------|--------------|-------------|-------------|--------------|-------------|
| M1a  | 41 | -869.048318  | $\omega$ :  | 0.069        | 1.000 | 1.000 |           |              |             |             |              |             |
|      |    |              | <b>p:</b>   | <b>0.903</b> | 0.097 |       |           |              |             |             |              |             |
|      |    |              | $\omega$ :  | <b>0.069</b> | 1.000 |       |           |              |             |             |              |             |
|      |    |              | p0:         | 0.918        |       |       |           |              |             |             |              |             |
|      |    |              | p:          | 1.725        |       |       |           |              |             |             |              |             |
|      |    |              | p1          | 0.081        |       |       |           |              |             |             |              |             |
| M8   | 43 | -868.869537  | q:          | 20.192       |       |       |           |              |             |             |              |             |
|      |    |              | $\omega$ :  | 1.000        |       |       |           |              |             |             |              |             |
|      |    |              | p:          | 0.460        |       |       |           |              |             |             |              |             |
| M7   | 41 | -972.778403  | q:          | 2.517        |       |       | M7 vs.M8  | 0.020        | Not Allowed |             |              |             |
| ODO1 |    |              |             |              |       |       |           |              |             |             |              |             |
| M3   | 48 | -1870.452557 | p:          | 0.547        | 0.408 | 0.045 |           |              |             |             |              |             |
|      |    |              | $\omega$ :  | 0.000        | 0.168 | 1.024 |           |              |             |             |              |             |
| M0   | 44 | -1913.442537 | $\omega$ 0: | 0.088        |       |       | M0 vs. M3 | <b>0.000</b> | Not Allowed |             |              |             |
| M2a  | 47 | -1885.179329 | p:          | 0.893        | 0.078 | 0.030 |           |              |             |             |              |             |
|      |    |              | $\omega$ :  | 0.053        | 1.000 | 1.000 |           |              |             |             |              |             |
| M1a  | 45 | -1885.179329 | <b>p:</b>   | <b>0.893</b> | 0.107 |       |           |              |             |             |              |             |
|      |    |              | $\omega$ :  | <b>0.053</b> | 1.000 |       |           |              |             | M1a vs. M2a | <b>1.000</b> | Not Allowed |
|      |    |              | p0:         | 0.958        |       |       |           |              |             |             |              |             |
|      |    |              | p:          | 0.201        |       |       |           |              |             |             |              |             |
| M8   | 45 | -1871.24     | p1          | 0.041        |       |       |           |              |             |             |              |             |
|      |    |              | q:          | 1.931        |       |       |           |              |             |             |              |             |
|      |    |              | $\omega$ :  | 1.073        |       |       |           |              |             |             |              |             |
|      |    |              | p:          | 0.226        |       |       |           |              |             |             |              |             |
| M7   | 46 | -1875.46     | q:          | 1.539        |       |       | M7 vs.M8  | 0.014        | Not Allowed |             |              |             |
| NEC1 |    |              |             |              |       |       |           |              |             |             |              |             |

|     |    |              |                             |              |       |       |             |              |             |
|-----|----|--------------|-----------------------------|--------------|-------|-------|-------------|--------------|-------------|
| M3  | 42 | -1899.902013 | p:                          | 0.337        | 0.434 | 0.229 |             |              |             |
|     |    |              | $\omega$ :                  | 0.024        | 0.209 | 0.697 |             |              |             |
| M0  | 38 | -1930.145943 | $\omega_0$ :                | 0.221        |       |       | M0 vs. M3   | <b>0.000</b> | Not Allowed |
|     |    |              | p:                          | 0.739        | 0.185 | 0.075 |             |              |             |
| M2a | 41 | -1906.20185  | $\omega$ :                  | 0.121        | 1.000 | 1.000 |             |              |             |
|     |    |              | <b>p:</b>                   | <b>0.739</b> | 0.261 |       |             |              |             |
| M1a | 39 | -1906.20185  | <b><math>\omega</math>:</b> | <b>0.121</b> | 1.000 |       | M1a vs. M2a | <b>1.000</b> | Not Allowed |
|     |    |              | p0:                         | 0.920        |       |       |             |              |             |
|     |    |              | p:                          | 0.613        |       |       |             |              |             |
|     |    |              | p1                          | 0.079        |       |       |             |              |             |
|     |    |              | q:                          | 2.195        |       |       |             |              |             |
| M8  | 41 | -1900.113914 | $\omega$ :                  | 1.000        |       |       |             |              |             |
|     |    |              | p:                          | 0.526        |       |       |             |              |             |
| M7  | 39 | -1900.00223  | q:                          | 1.418        |       |       | M7 vs. M8   | 0.852        | Not Allowed |





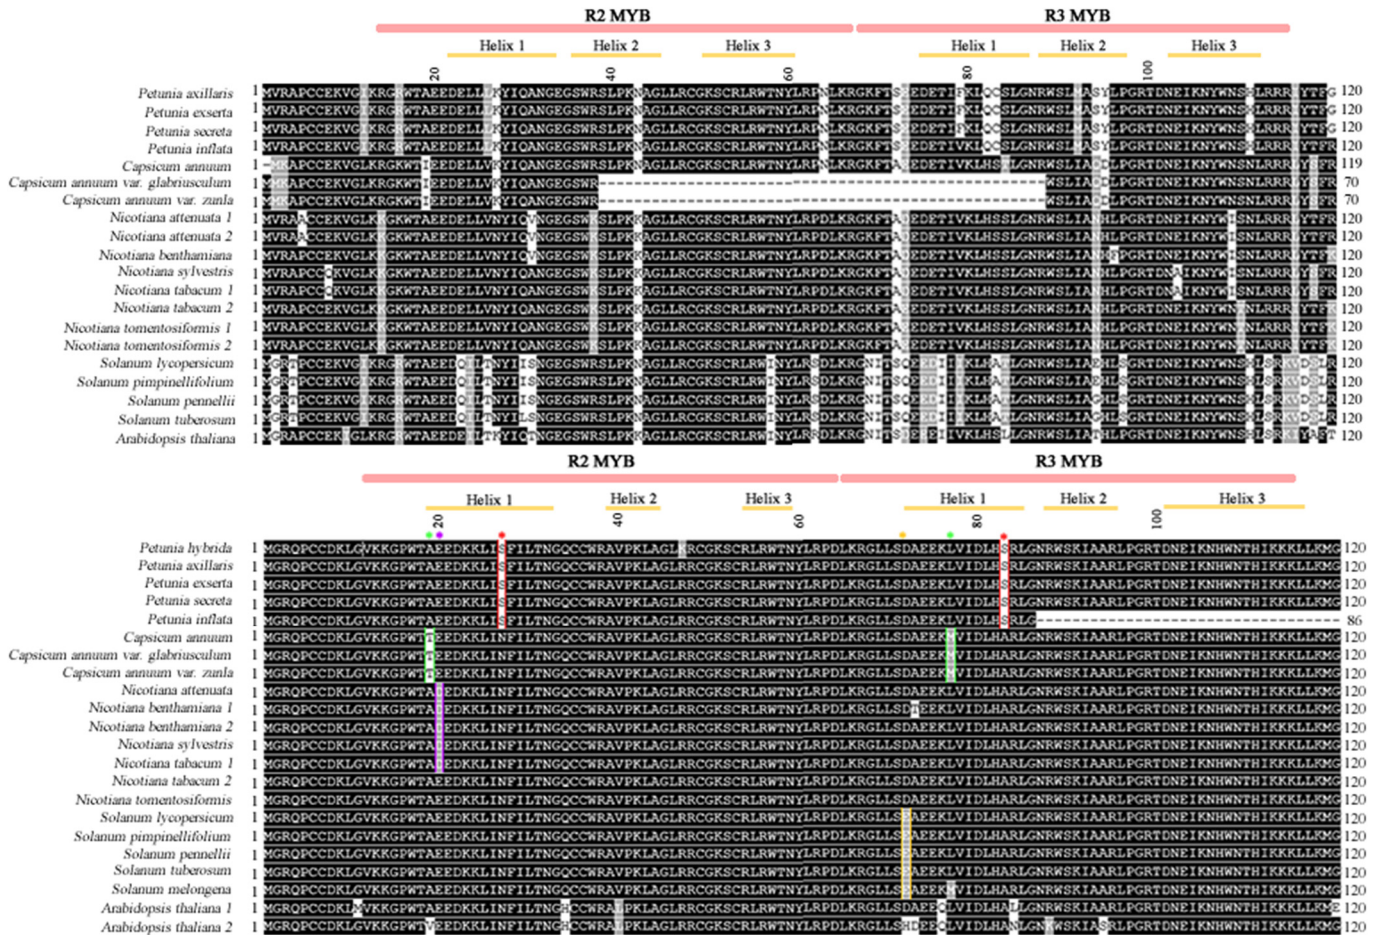

**Figure S2.** Multiple sequence alignment of MYB-FL (A) and ODO1 (B) R2R3 protein domain in Solanaceae species. Dark boxes indicate conserved amino acids. Colored lines above the sequences indicated the R2R3 domains (light pink line) and the helices structure (yellow line). Symbols (\*) indicate each genus exclusive substitutions [*Petunia* (red), *Capsicum* (green), *Nicotiana* (purple), and *Solanum* (yellow)]. All substitutions occur within helix 1 of the R2R3 domain.

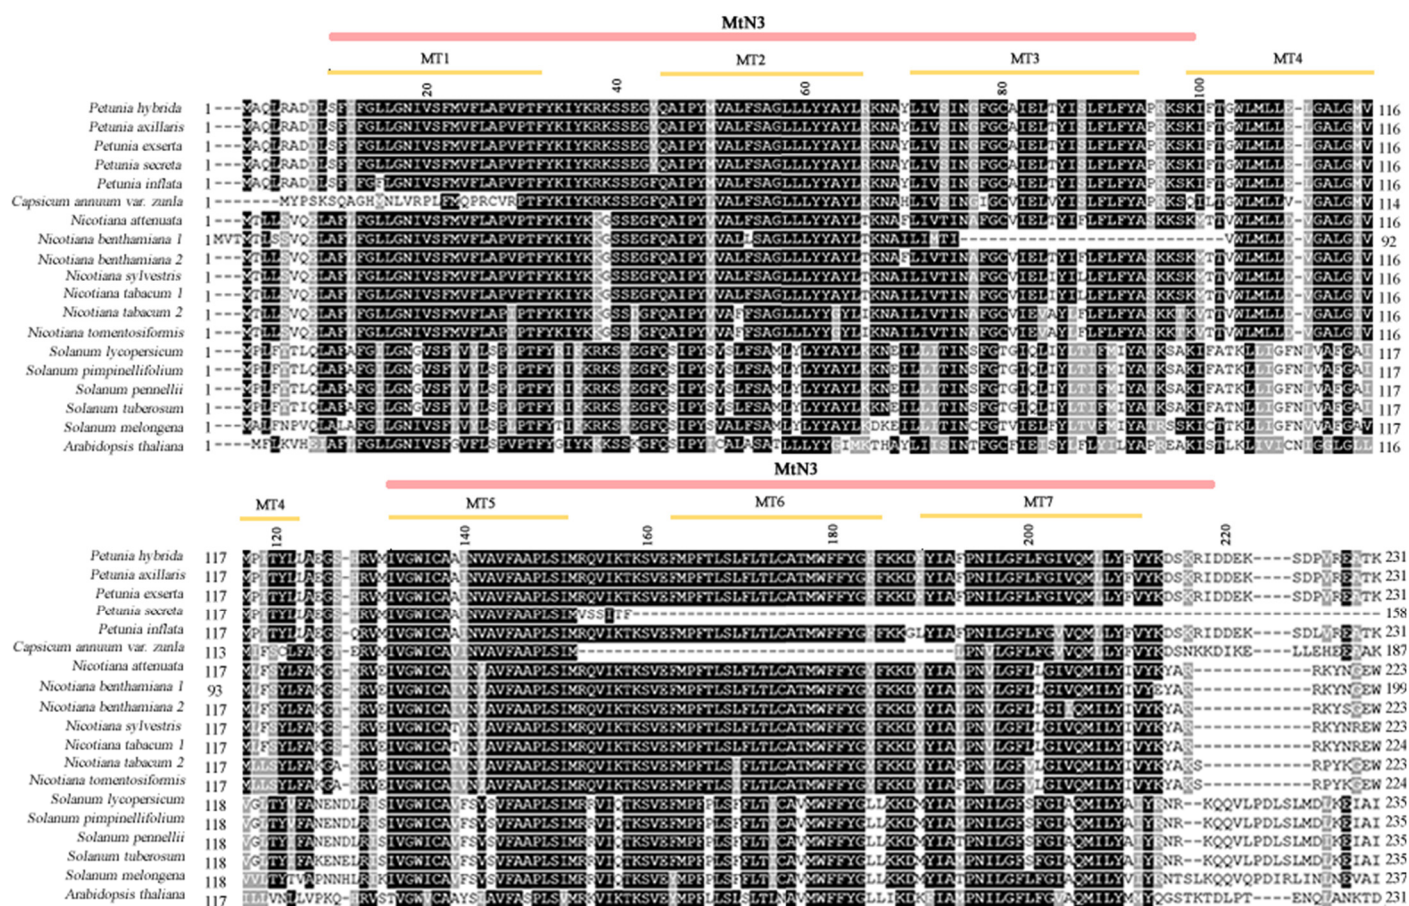

**Figure S3.** Multiple sequence alignment of the NEC1 MtN3 protein domain in Solanaceae species. Dark boxes indicate conserved amino acids. Colored lines above the sequences indicated the MtN3 domain (high pink line) that consist of two tandemly repeated 3-TMs separated by a single TM (yellow line).



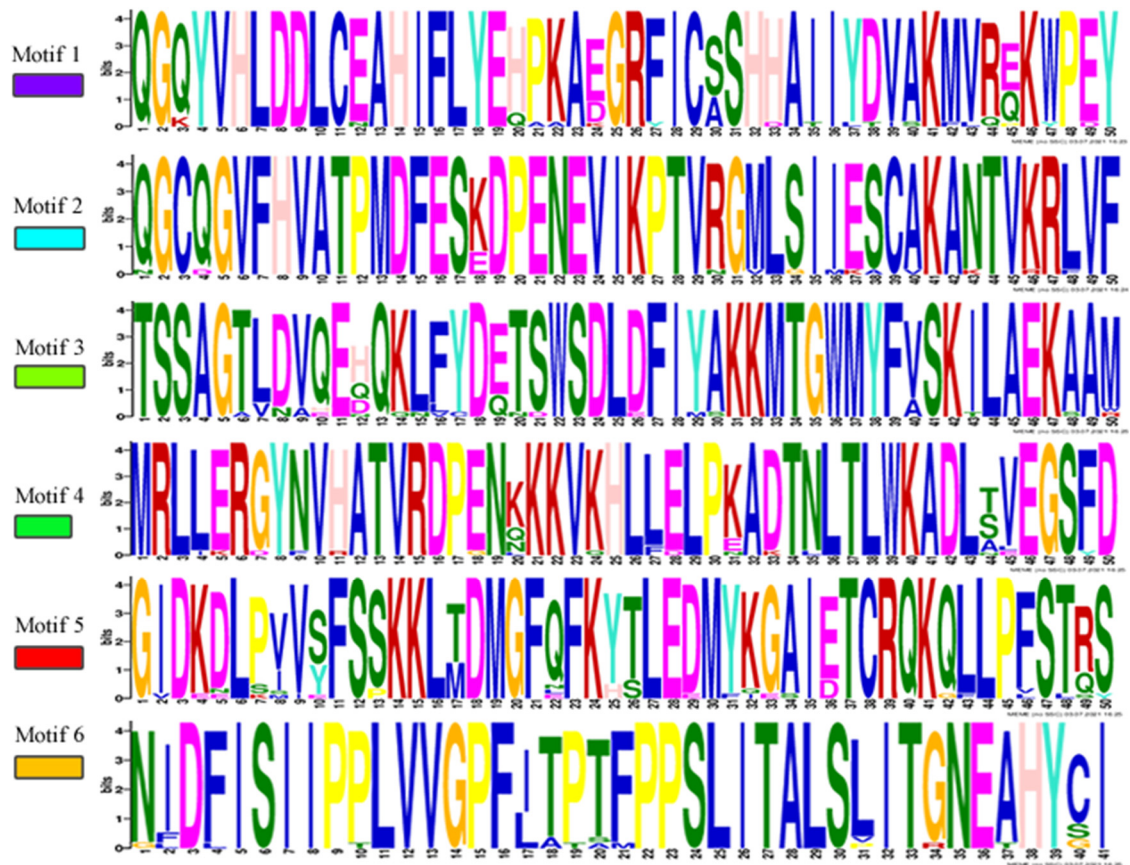

**Figure S4.** Logo of conserved motifs of DFR protein sequences. Numbered and colored boxes indicate the motifs identified in MEME analyze. Each motif has a corresponding amino acid logo. Large letters indicate the conserved and small letters indicate variable positions, with variations also indicated in the last.

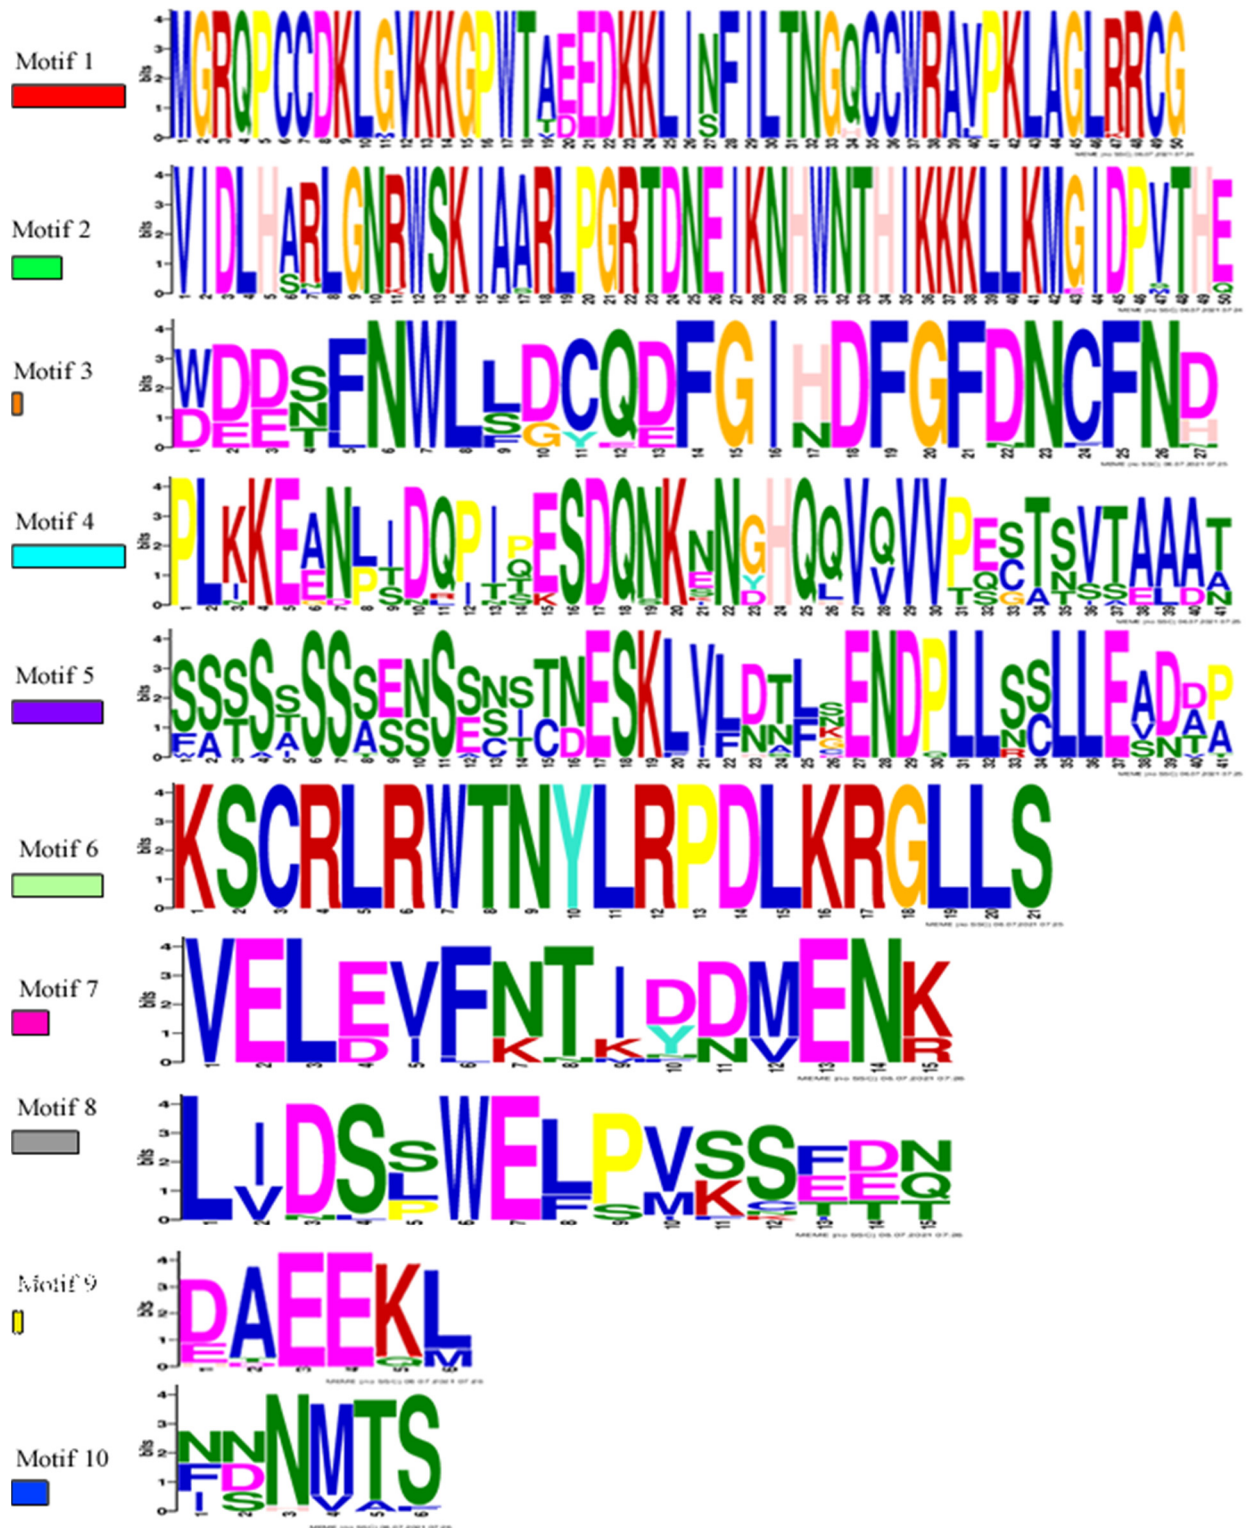

**Figure S5.** Logo of conserved motifs of ODO1 protein sequences. Numbered and colored boxes indicate the motifs identified in MEME analyze. Each motif has a corresponding amino acid logo. Large letters indicate the conserved and small letters indicate variable positions, with variations also indicated in the last.

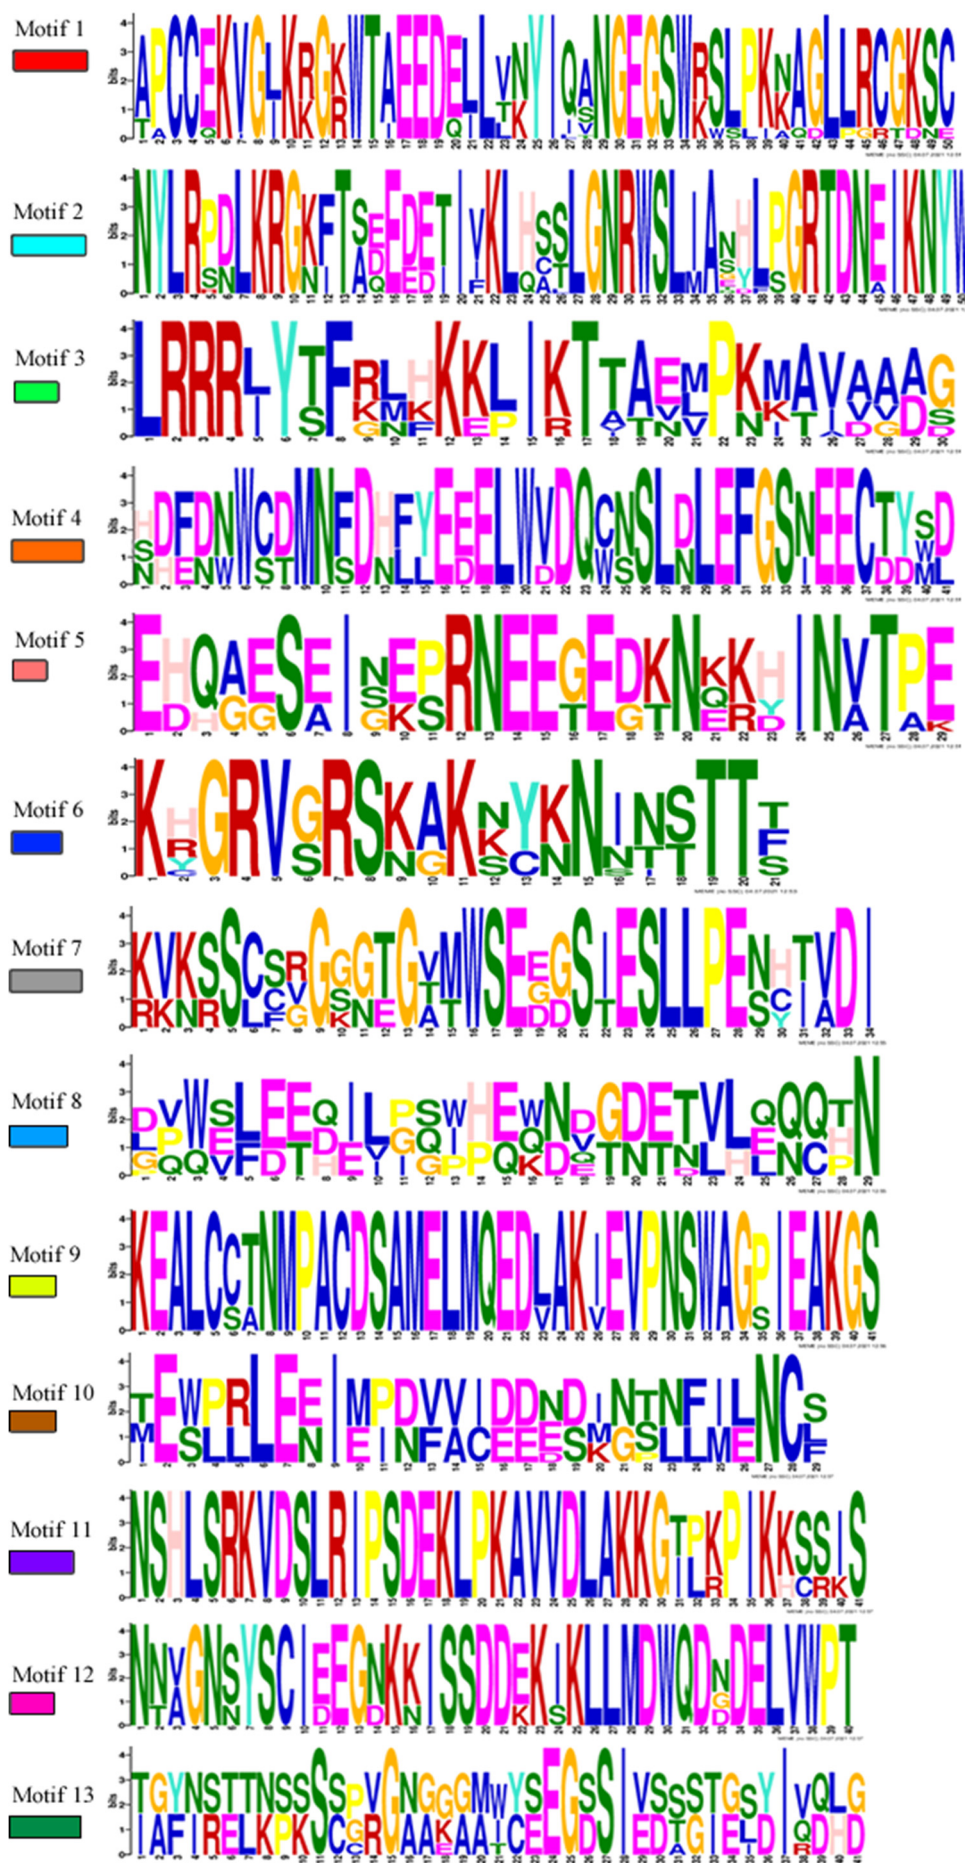

**Figure S6.** Logo of conserved motifs of MYB-FL protein sequences. Numbered and colored boxes indicate the motifs identified in MEME analyze. Each motif has a corresponding amino acid logo. Large letters indicate the conserved and small letters indicate variable positions, with variations also indicated in the last.



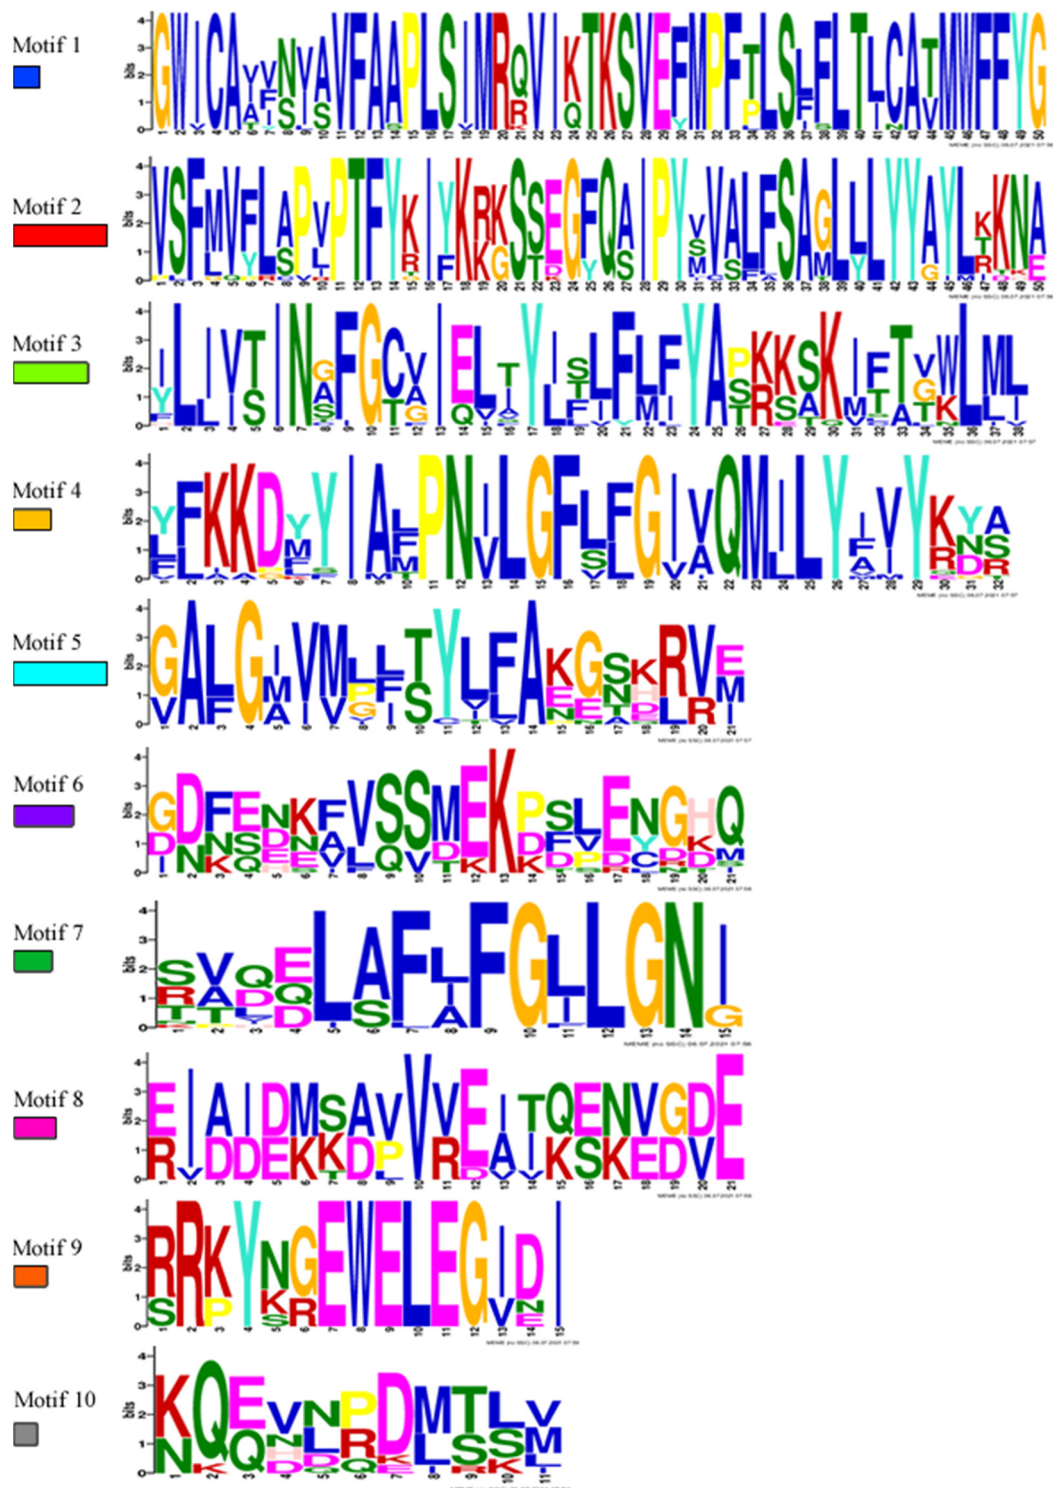

**Figure S7.** Logo of conserved motifs of NEC1 protein sequences. Numbered and colored boxes indicate the motifs identified in MEME analyze. Each motif has a corresponding amino acid logo. Large letters indicate the conserved and small letters indicate variable positions, with variations also indicated in the last.
